# Supplementary material
Source: publisher figshare collection journal article supplement (https://acs.figshare.com/ndownloader/files/4005121)
Supplement: Supplementary file 1 [file 4005121]

## Supporting Information

### Composite of $\text{LiFePO}_4$ with Titanium Phosphate Phases as Lithium-Ion Battery Electrode Material

Gary M. Koenig, Jr.<sup>a+\*</sup>, Jiwei Ma<sup>a</sup>, Baris Key<sup>a</sup>, Justin Fink<sup>a</sup>, Ke-Bin Low<sup>b</sup>, Reza Shahbazian-Yassar<sup>b,c</sup>, and Ilias Belharouak<sup>a\*</sup>

<sup>a</sup>Chemical Sciences and Engineering Division  
Argonne National Laboratory  
9700 South Cass Ave.  
Argonne, IL 60439

<sup>b</sup>Research Resources Center - East (M/C 337)  
The University of Illinois at Chicago  
845 West Taylor St  
Chicago, IL 60607-7058

<sup>c</sup>Department of Mechanical Engineering  
Michigan Technological University  
1400 Townsend Dr.  
Houghton, MI 49931

+Present Address: Department of Chemical Engineering  
University of Virginia  
102 Engineers Way  
Charlottesville, VA 22903

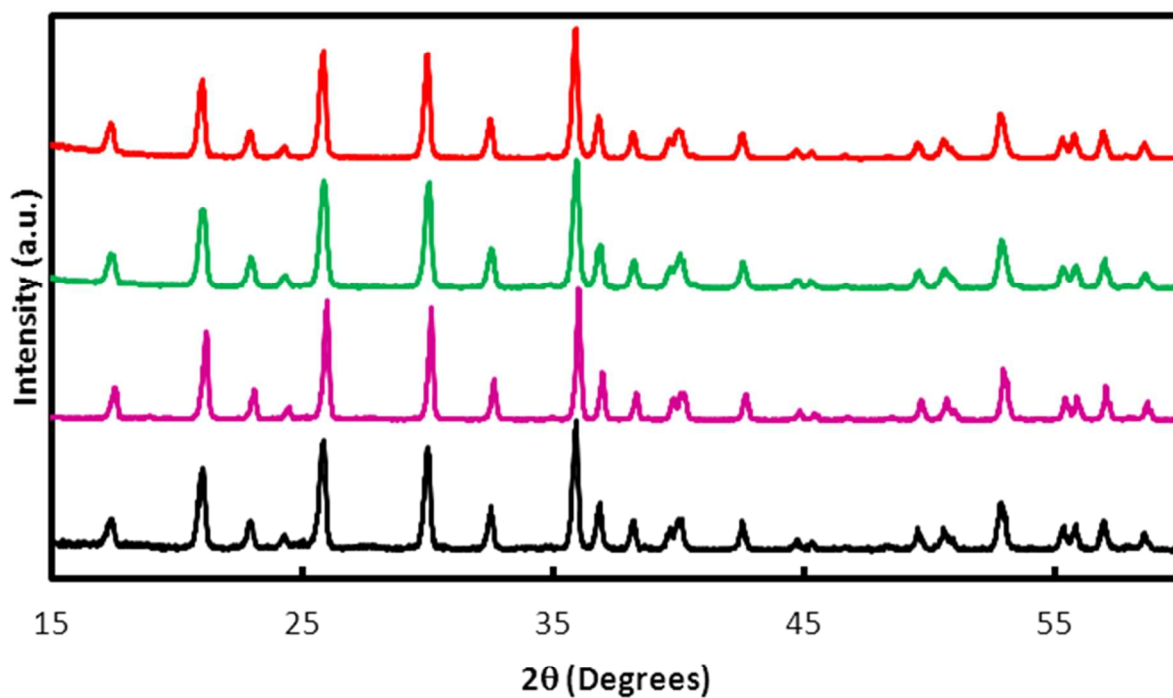

**Fig. S1.** X-ray diffraction patterns for powders of  $\text{LiFePO}_4$  (red, top pattern),  $0.985\text{LiFePO}_4 \cdot \text{Li}_{0.015}\text{Ti}_{0.015}(\text{PO}_4)_8$  (green, second from top pattern),  $0.95\text{LiFePO}_4 \cdot \text{Li}_{0.05}\text{Ti}_{0.05}(\text{PO}_4)_8$  (purple, second from bottom pattern),  $0.9\text{LiFePO}_4 \cdot \text{Li}_{0.1}\text{Ti}_{0.1}(\text{PO}_4)_8$  (black, bottom pattern).

Table S1. Crystallographic lattice parameters determined from the X-ray diffraction patterns shown in Figure S1 for  $\text{LiFePO}_4$  and the composites.

|                     | $\text{LiFePO}_4$ | $0.985 \cdot \text{LiFePO}_4 \cdot \text{Li}_{0.015} \text{Ti}_{0.015} (\text{PO}_4)_{4/5}$ | $0.95 \cdot \text{LiFePO}_4 \cdot \text{Li}_{0.05} \text{Ti}_{0.05} (\text{PO}_4)_{4/5}$ | $0.9 \cdot \text{LiFePO}_4 \cdot \text{Li}_{0.1} \text{Ti}_{0.1} (\text{PO}_4)_{4/5}$ |
|---------------------|-------------------|---------------------------------------------------------------------------------------------|------------------------------------------------------------------------------------------|---------------------------------------------------------------------------------------|
| a (Å)               | 10.314 (9)        | 10.311 (1)                                                                                  | 10.324 (6)                                                                               | 10.307 (5)                                                                            |
| b (Å)               | 5.999 (4)         | 5.996 (2)                                                                                   | 6.003 (2)                                                                                | 5.993 (4)                                                                             |
| c (Å)               | 4.689 (1)         | 4.686 (4)                                                                                   | 4.691 (6)                                                                                | 4.681 (9)                                                                             |
| V (Å <sup>3</sup> ) | 290.18 (1)        | 289.74 (9)                                                                                  | 290.78 (3)                                                                               | 289.23 (4)                                                                            |

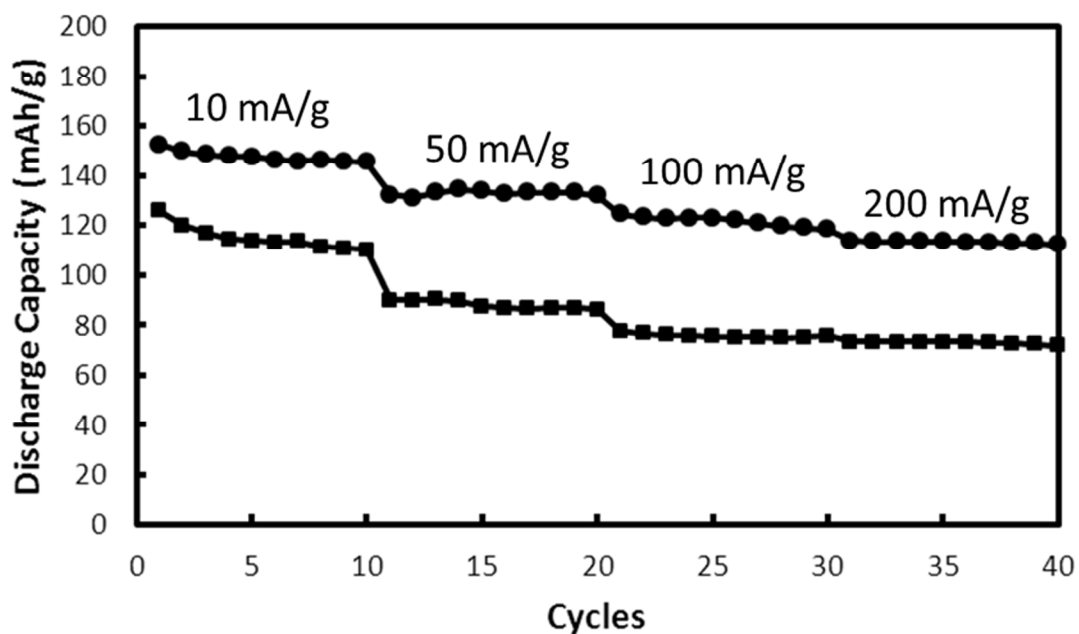

**Fig. S2.** Discharge capacity of 0.9LiFePO<sub>4</sub>·Li<sub>0.1</sub>Ti<sub>0.1</sub>(PO<sub>4</sub>)<sub>8</sub> (●) and LiFePO<sub>4</sub> (■) at charge/discharge rates of 10 mA/g, 50 mA/g, 100 mA/g, and 200 mA/g (~C/15, C/3, C/1.5, and 1.33 C). Cells were charged and discharged for 10 cycles at each rate.

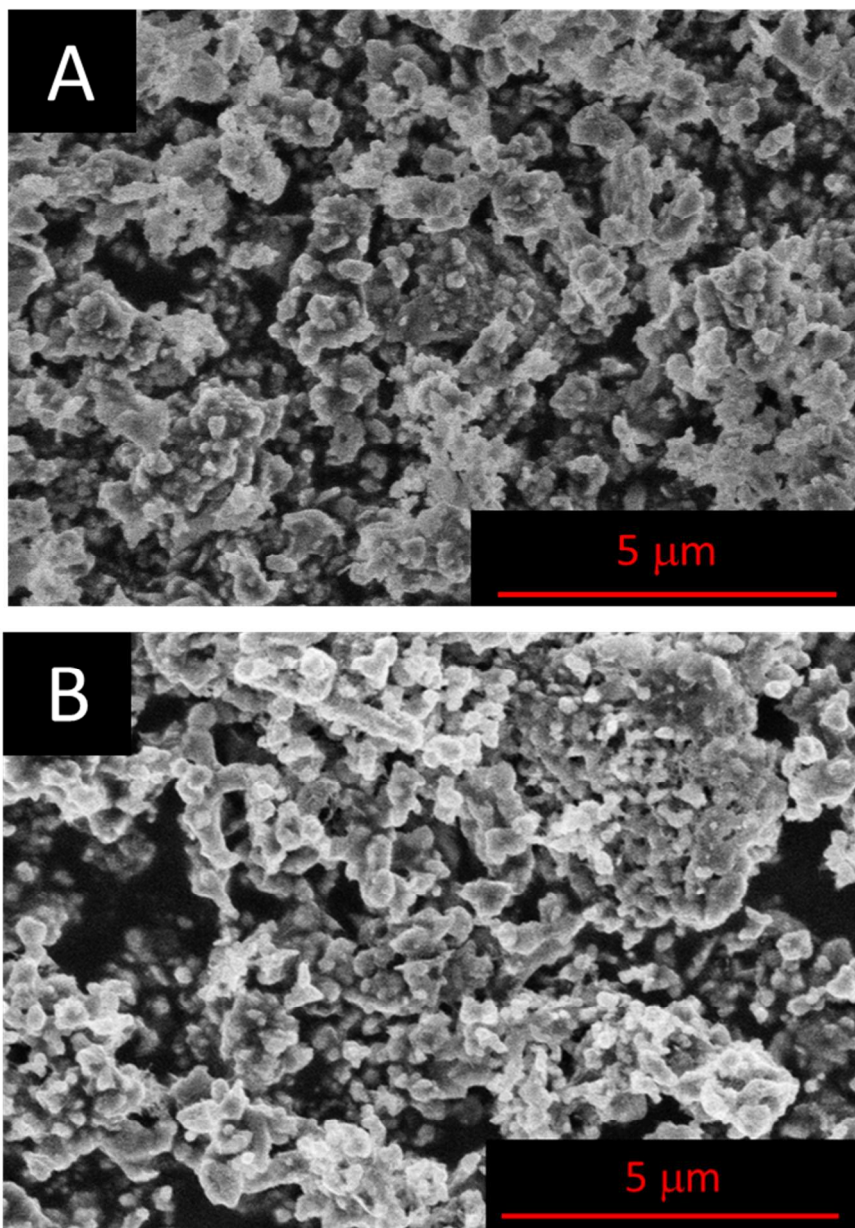

**Fig. S3.** Scanning electron micrographs of (A)  $\text{LiFePO}_4$  and (B)  $0.9\text{LiFePO}_4\cdot\text{Li}_{0.1}\text{Ti}_{0.1}(\text{PO}_4)_\delta$  powders.

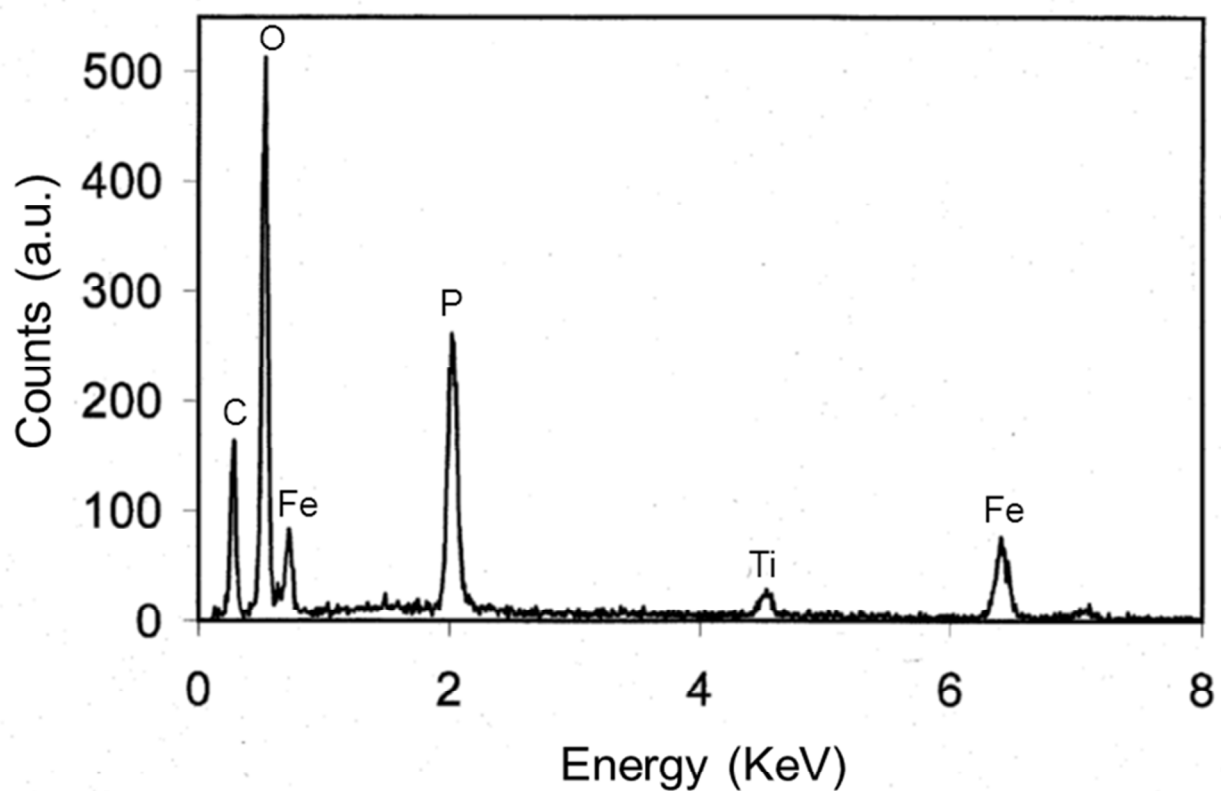

**Fig. S4.** Scanning electron microscopy energy dispersive x-ray spectroscopy spectrum for  $0.9\text{LiFePO}_4 \cdot \text{Li}_{0.1}\text{Ti}_{0.1}(\text{PO}_4)_8$  powder. Peaks have been labeled corresponding to C, O, Fe, P, and Ti. The powder was mounted on carbon tape.

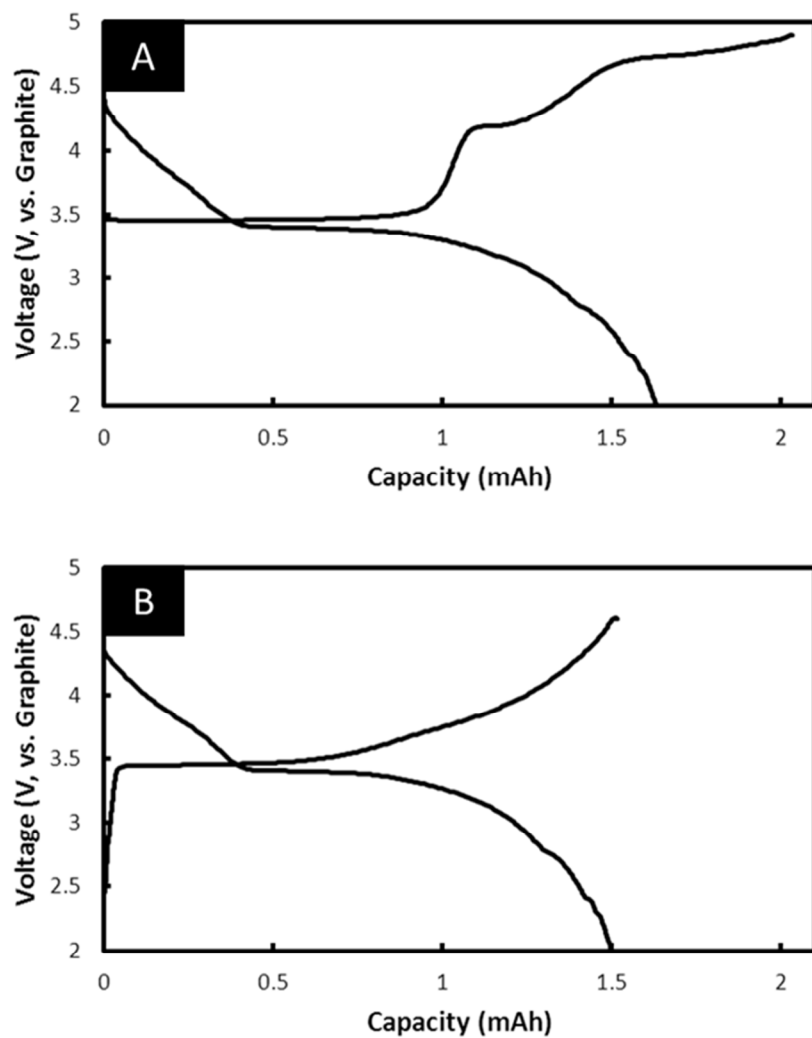

**Fig. S5.** The first (A) and second (B) charge and discharge cycles of a cell comprised of a graphite anode and a cathode where the active material is a mixture of 50 wt%  $0.9\text{LiFePO}_4 \cdot \text{Li}_{0.1}\text{Ti}_{0.1}(\text{PO}_4)_8$  and 50 wt%  $\text{Li}_{1.2}(\text{Mn}_{0.62}\text{Ni}_{0.38})_{0.8}\text{O}_2$ . The cell was cycled at a rate of 20 mA/g.
